# Supplementary material for: Temperature-controlled electrospray ionization mass spectrometry as a tool to study collagen homo- and heterotrimers
Source: Royal Society of Chemistry journal article supplement (doi:10.1039/c9sc03248g), 2019-01-01
Supplement: c9sc03248g1.pdf [file c9sc03248g1.pdf]

Supporting Information for:

## **Temperature-controlled Electrospray Ionization Mass Spectrometry as a Tool to Study Collagen Homo- and Heterotrimers**

Martin Köhler, Adrien Marchand, Nina B. Hentzen, Jasmine Egli, Alina I. Begley, Helma Wennemers\*  
and Renato Zenobi\*

Department of Chemistry and Applied Biosciences, ETH Zurich, 8093, Zurich, Switzerland

\*Correspondence and requests for materials should be addressed to

R.Z. (email: zenobi@org.chem.ethz.ch, Tel.: +41 44 632 43 76)

and H.W. (email: helma.wennemers@org.chem.ethz.ch, Tel.: +41 44 633 37 77)

### **Contents of supporting information:**

**Figure S1.** CD spectroscopy scans of CMP **A** at different temperatures

**Figure S2.** Thermal denaturation profiles via CD spectroscopy of CMPs **B**, **C**, **D** and **B:C:D** mixtures

**Figure S3.** Native MS spectrum of an annealed mixture of CMP **B:C:D** (1:1:3)

**Figure S4.** Native MS spectrum of an annealed mixture of CMP **E:F** (1:1)

**Figure S5.** Comparison of melting curves of CMP **E:F** (1:1) obtained via CD spectroscopy and MS

**Figure S6.** Native MS spectrum of CMP **A** with corresponding ion mobility data

**Table S1.** Overview of  $T_m$  values obtained via CD spectroscopy and MS

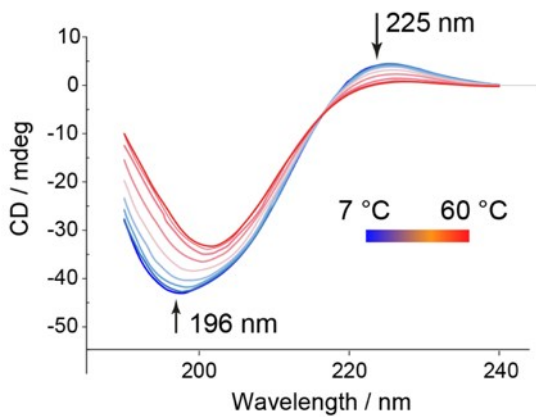

**Figure S1.** CD spectroscopy of CMP A (50  $\mu$ M in 10 mM aq.  $\text{NH}_4\text{Ac}$  at pH 7) at different temperatures ranging from 7  $^\circ\text{C}$  to 60  $^\circ\text{C}$ . Two CD bands were detected at 225 nm and 196 nm, which are indicative of triple helix formation.

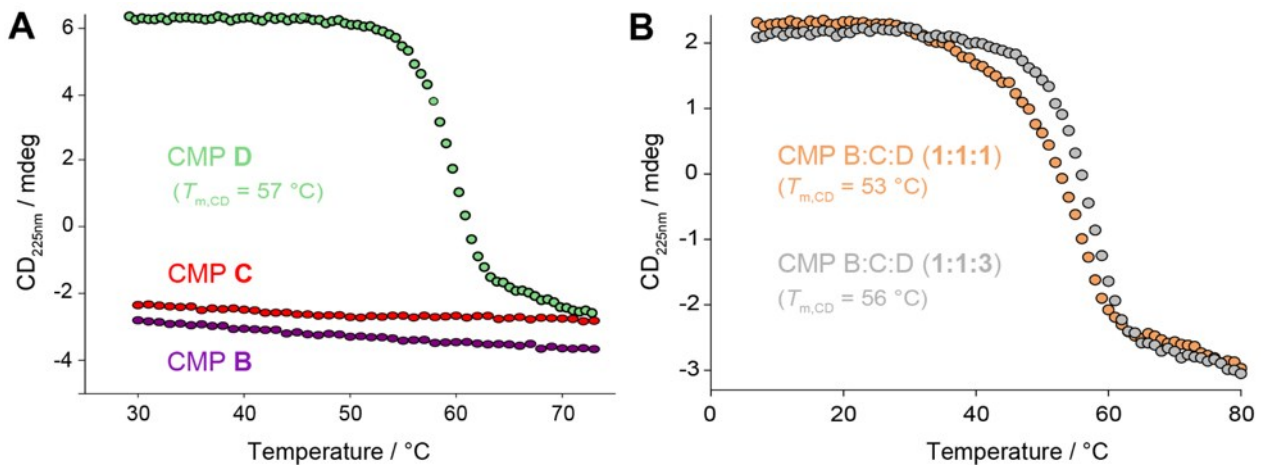

**Figure S2.** (A) CD spectroscopic thermal denaturation studies of CMP B (purple), C (red) and D (green). 50  $\mu$ M solutions in 10 mM aq.  $\text{NH}_4\text{Ac}$  at pH 7 were used. Only CMP D showed a characteristic, sigmoidal melting curve with a  $T_{M,CD} = 57$   $^\circ\text{C}$  (heating rate of 1  $^\circ\text{C}/\text{min}$ ). (B) CD spectroscopic thermal denaturation studies of mixtures of CMPs B, C, and D in molar ratios of 1:1:1 (orange) and 1:1:3 (gray). 100  $\mu$ M solutions in 10 mM aq.  $\text{NH}_4\text{Ac}$  at pH 7 were used. The following melting temperatures were obtained: B:C:D (1:1:1):  $T_{M,CD} = 53$   $^\circ\text{C}$  and B:C:D (1:1:3):  $T_{M,CD} = 56$   $^\circ\text{C}$  (heating rate of 1  $^\circ\text{C}/\text{min}$ ).

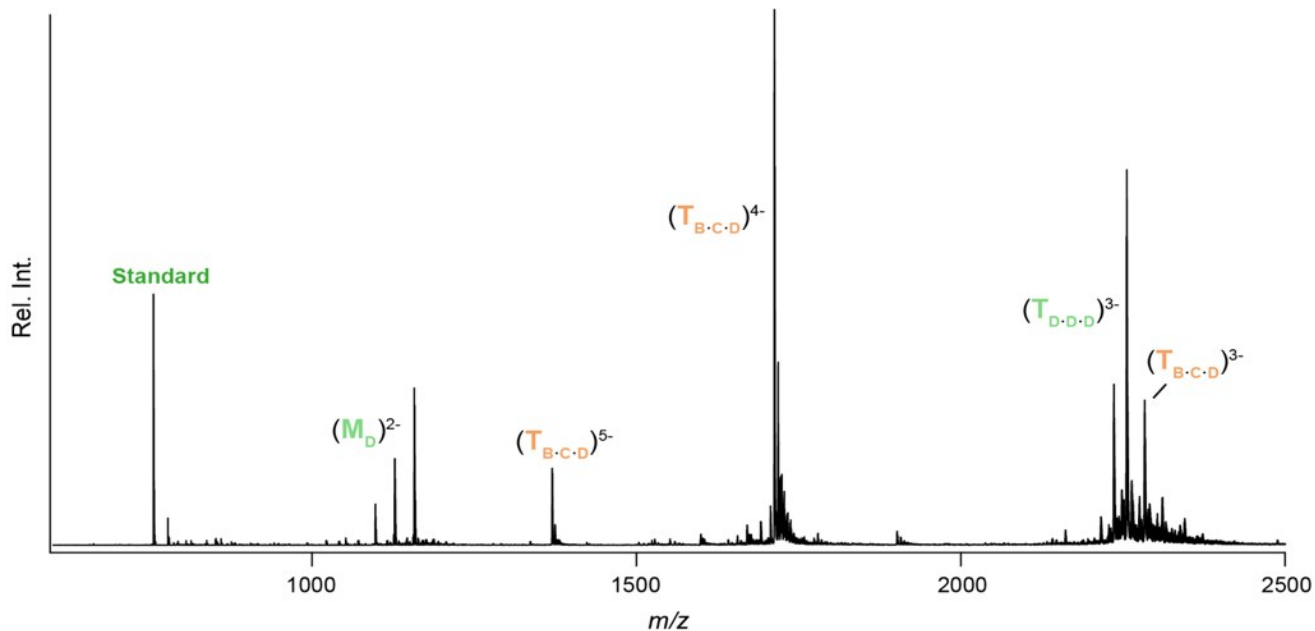

**Figure S3.** Native MS spectrum of an annealed mixture of CMPs **B:C:D** (1:1:3). 100  $\mu$ M of total peptide concentration in 10 mM aq.  $\text{NH}_4\text{Ac}$  at pH 7 was used.  $m/z$  Signals corresponding to the specific **B-C-D** heterotrimer and the **D-D-D** homotrimer are present.

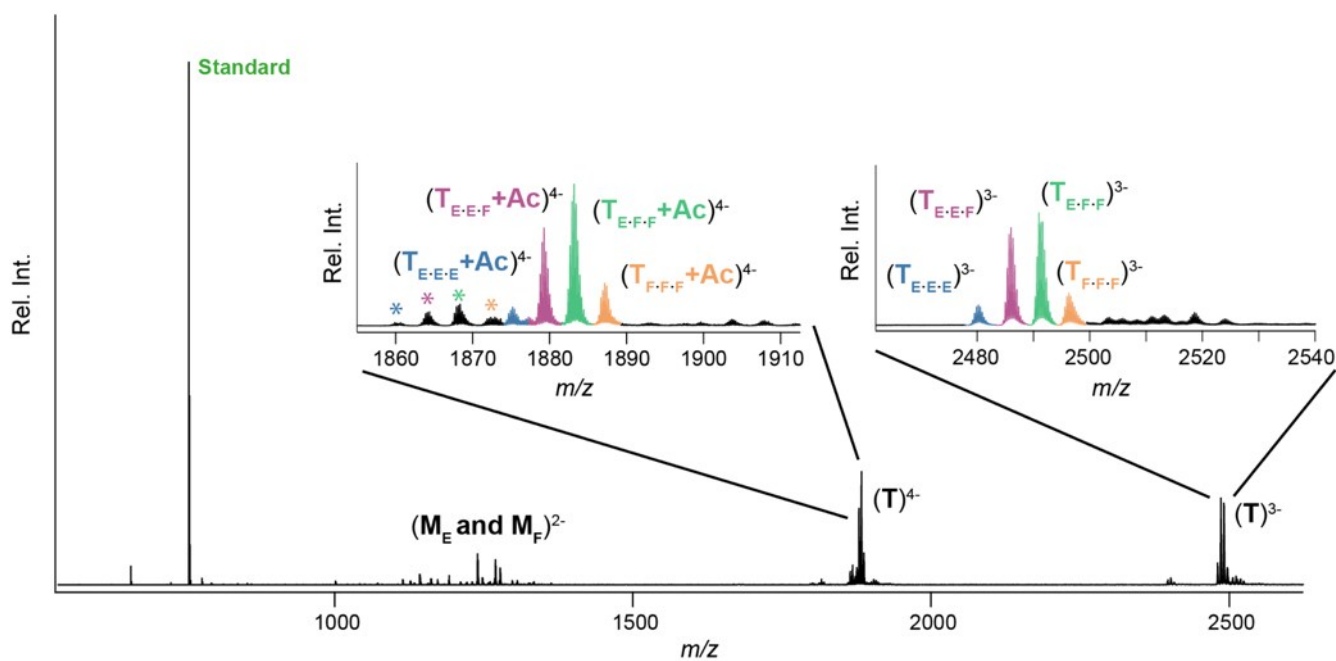

**Figure S4.** Native MS spectrum of an annealed mixture of CMPs **E** and **F** (1:1). 50  $\mu$ M solutions in 10 mM aq.  $\text{NH}_4\text{Ac}$  at pH 7 were used.  $m/z$  Signals corresponding to the **E-E-E** (blue) and **F-F-F** (orange) homotrimers and **E-F-F** (green) and **E-E-F** (purple) heterotrimers were detected. Charge states 3<sup>-</sup> and 4<sup>-</sup> were observed and enlarged spectra of the trimeric species are shown. Beside the acetate adducts of the fourfold negatively charged trimers, we also detected the deprotonated species (labeled with \*).

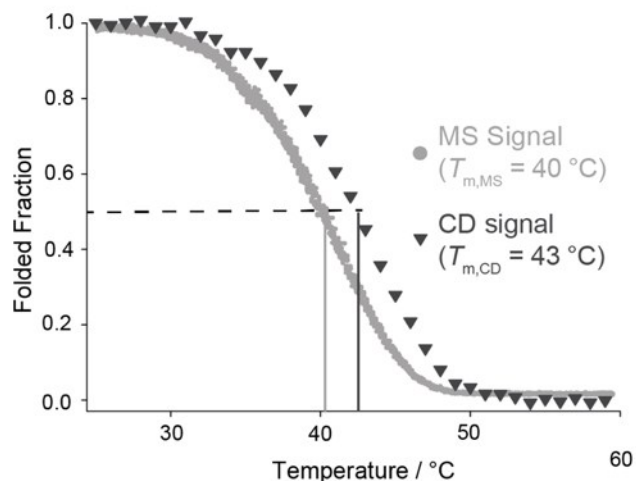

**Figure S5.** Folded fractions of the triple helices formed in a mixture of CMPs **E** and **F** (1:1) as a function of temperature, as monitored by CD spectroscopy (triangles) and MS (dots). 50  $\mu$ M solutions in 10 mM aq.  $\text{NH}_4\text{Ac}$  at pH 7 were used. For comparison with melting temperatures obtained by CD spectroscopy, the signals of all trimeric species detected by temperature-controlled MS were summed up and normalized. The obtained melting temperatures of  $T_{m,\text{CD}} = 43$  °C and  $T_{m,\text{MS}} = 40$  °C are in good agreement (heating rate of 1°C/min).

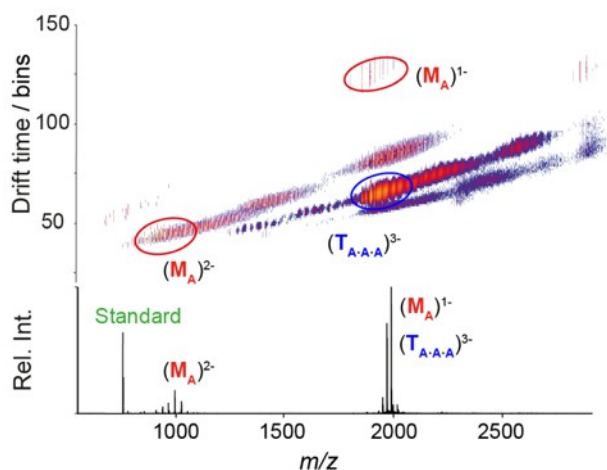

**Figure S6.** Native ESI MS spectrum of CMP **A** with the corresponding ion mobility. The signal of the triply negatively charged **A-A-A** homotrimer ( $T_{\text{A-A-A}}$ ) overlaps with the signal of the singly charged CMP **A** monomer ( $M_{\text{A}}$ ).

**Table S1.** Comparison of  $T_m$  values as determined by thermal denaturation studies<sup>a</sup> using CD spectroscopy or temperature-controlled nESI MS as monitoring tools. All values determined at a heating rate of 1 °C/min for 50  $\mu$ M (or 100  $\mu$ M for B·C·D) solutions in 10 mM aq.  $\text{NH}_4\text{Ac}$  at pH 7.

| Entry | Composition of triple helix | $T_{m,CD} / ^\circ\text{C}$ | $T_{m,MS} / ^\circ\text{C}$ |
|-------|-----------------------------|-----------------------------|-----------------------------|
| 1     | A·A·A                       | 46                          | 45                          |
| 2     | B·C·D                       | 53                          | 53                          |
| 3     | D·D·D                       | 57                          | 55                          |
| 4     | E·E·E                       | 38                          | 35                          |
| 5     | E·E·F                       | n.d.                        | 38                          |
| 6     | E·F·F                       | n.d.                        | 42                          |
| 7     | F·F·F                       | 46                          | 43                          |
